# Supplementary material
Source: PubMed Central journal article supplement (PMC3083231)

## SUPPLEMENTAL DATA

**Fig. S1. AMPK activity in different cancer cell lines and in primary keratinocytes.** GAPDH served as a gel loading control. P-AMPK $\alpha$  and P-ACC levels were normalized to GAPDH levels (bottom). The graphs show the calculated averages and S.D. from two independent experiments.

**Fig. S2. c-Src regulates AMPK through a PKC isoform.** Cells were starved for serum and after 2h were treated with BIS1 (A, B) or PP1 (C, D). After 4 h cells were lysed, and analyzed by western blot. (A, C) A431 cells (B, D) OVCAR3 cells. Representative western analysis using the indicated antibodies. GAPDH served as a gel loading control. P-AMPK $\alpha$  and P-ACC levels were normalized to GAPDH levels (bottom) (A, B). The graphs show the calculated averages and S.D. from three independent experiments. (C, D) The graphs show the calculated averages and S.D. from two independent experiments.

**Fig. S3. c-Src regulates AMPK through PKC $\alpha$ .** (A, B) Cells were starved for serum and after 2h were treated with PP1. After 4 h cells were lysed, and analyzed by western blot. (C, D) Cells were transfected with siRNA against c-Src. After 96h cells were lysed, and analyzed by western blot. (A, C) A431 cells (B, D) OVCAR3 cells. Representative western analysis using the indicated antibodies. GAPDH served as a gel loading control. V-vehicle; siCtrl-non-targeting siRNA; siSrc- siRNA against c-Src. P-PKC $\alpha$  levels were normalized to GAPDH levels (bottom) (A, B). The graphs show the calculated averages and S.D. from four independent experiments. (C, D) The graphs show the calculated averages and S.D. from three independent experiments.

**Fig. S4. Depletion of PDK1 had no effect on the activity of PKC $\alpha$ .** Cells were transfected with siRNA against PDK1. After 96h, cells were lysed, and analyzed by western blot. (A) OVCAR3 cells (B) A431 cells. Representative western analysis using the indicated antibodies. GAPDH served as a gel loading control. V-vehicle, siCtrl-non-targeting siRNA; siPDK1- siRNA against PDK1. (A, B) P-PKC $\alpha$  levels were normalized to GAPDH levels (bottom). The graphs show the calculated averages and S.D. from two independent experiments.

**Fig. S5. Immunoprecipitation with PLC $\gamma$ 1 specific antibody.** Protein lysates from A431 (A) or OVCAR3 cells (B) were immunoprecipitated with PLC $\gamma$ 1-specific antibody (2822, which recognizes an epitope in the C-terminus) or control IgG. The blots, which are part of the same gel, were cut for ease of presentation.

**Fig. S6. c-Src regulates PKC $\alpha$  through PLC $\gamma$ 1.** (A, B) Cells were starved for serum and after 2h were treated with PP1. After 4 h cells were lysed, and analyzed by western blot. (C, D) Cells were transfected with siRNA against c-Src. After 96h cells were lysed, and analyzed by western blot. (A, C) A431 cells (B, D) OVCAR3 cells. Representative western analysis using the indicated antibodies. GAPDH served as a gel loading control. V-vehicle; siCtrl-non-targeting siRNA; siSrc- siRNA against c-Src. (A-D) P-PLC $\gamma$  levels were normalized to GAPDH levels (bottom). The graphs show the calculated averages and S.D. from two independent experiments.

**Fig. S7. c-Src regulates PLC $\gamma$ 1.** NIH 3T3 and SrcNIH cells were starved for serum and after 2h were treated with PP1. After 4 h cells were lysed, and analyzed by western blot. P-PLC $\gamma$  levels were normalized to GAPDH levels (bottom). The graphs show the calculated averages and S.D. from two independent experiments.

**Fig. S8. Activation of AMPK by c-Src is mediated through PKC $\alpha$  and LKB1.** (A, B) Cells were starved for serum and after 2h were treated with PP1. After 4 h cells were lysed, and analyzed by western blot. (C, D) Cells were transfected with siRNA against c-Src. After 96h cells were lysed, and analyzed by western blot. (A, C) A431 cells (B, D) OVCAR3 cells. Representative western analysis using the indicated antibodies. GAPDH served as a gel loading control. V-vehicle; siCtrl-non-targeting siRNA; siSrc- siRNA against c-Src. (A-D) P-LKB1 levels were normalized to GAPDH levels (bottom). The graphs show the calculated averages and S.D. from two independent experiments. (E). OVCAR cells were transfected

with siRNA against LKB1. After 72 h cells were lysed and analyzed by western blot. A representative blot is shown.

**Fig. S9. (A). GST-LKB1 is a direct substrate of PKC $\alpha$  in a cell free assay.** GST-tagged LKB1 (lanes 4-7), was expressed in HEK-293T cells, purified on glutathione-Sepharose and added in the indicated amounts to test for the ability to undergo phosphorylation by PKC $\alpha$ . Recombinant GST-PKC $\alpha$  was tested for its ability to phosphorylate GST-LKB1 using [ $\gamma$ - $^{32}$ P] ATP as described in Materials and Methods. Lanes 1-3 represent controls. The reaction was analyzed by SDS-PAGE and autoradiography (UPPER PANEL). Arrows show the migration of GST-PKC $\alpha$  (which autophosphorylates) and GST-LKB1. The membrane was also analyzed by western blotting and probed with anti PKC $\alpha$ , anti-P-LKB1 and anti-LKB1 antibodies (LOWER PANEL). The experiment was performed two times (radioactive assay and non-radioactive assay). **(B). Inhibition of c-Src leads to inhibition of PLC $\gamma$ , PKC $\alpha$ , LKB1 and ACC.** OVCAR3 and A431 cells were starved for 2 h and then treated with PP1 (10 $\mu$ M) for 4 hours longer. Cells were lysed and analyzed by western blot. Representative blots are shown. The graph shows average values from two independent experiments, where values for the PP1-treated cells (10  $\mu$ M) were normalized to values for vehicle-treated cells (V).

**Fig. S10. IRES vs. cap-dependent translation.** A431 and OVCAR3 cells were transfected with the bicistronic reporter construct. 48 h after transfection the cells were treated for 4 h with AICAR and Compound C (CC). After 52 h, cell lysates were prepared and assayed for firefly luciferase activity (FLuc) (A,C,F,H) and renilla activity (RLuc) (B,D,E,G). (A-D) A431 cells, (E-H) OVCAR3 cells. IRES-dependent translation (A,B,E,F) and cap-dependent translation (C,D,G,H) were measured as described in (138). Values are expressed as a percentage of the control (V-vehicle). Error bars represent the SD of duplicate samples. The experiment was performed three times. **(I)** Cells were transfected with pRF, pRHifF and pStemRHifF. After 48 hours cells were treated with AICAR for 4 hours. Cell lysates were prepared and assayed for firefly luciferase activity (FLuc) and renilla activity (RLuc). Cap-dependent translation of renilla luciferase is repressed in the pStemRHifF plasmid. The increased ratio of firefly luciferase to renilla luciferase activity indicates bona fide IRES translation from the Hif 5' UTR.

**Fig. S11. AMPK is not regulated by c-Src in HeLa cells and MCF7 cells.** Cells were starved for serum and after 2h were treated with PP1 (A, B) or BIS1 (C, D). After 4 h cells were lysed, and analyzed by western blot (A, C) HeLa (B, D) MCF7. Representative western analysis using the indicated antibodies was shown. Tubulin served as a gel loading control.

**Fig. S12. AMPK is not regulated by c-Src in primary keratinocytes.** Cells were starved for serum and after 2h were treated with PP1 to inhibit c-Src. After 4 h cells were lysed, and analyzed by western blot. The graph shows the calculated averages and S.D. from two independent experiments.

Fig. S1

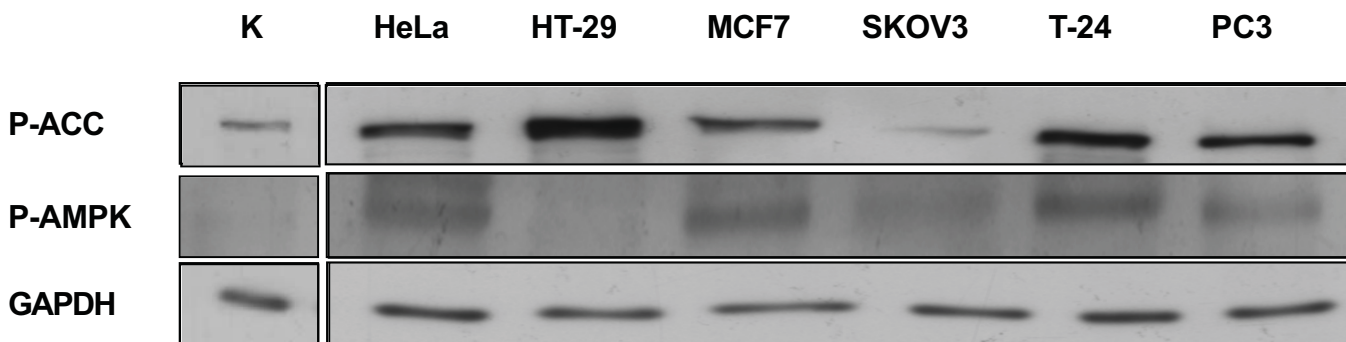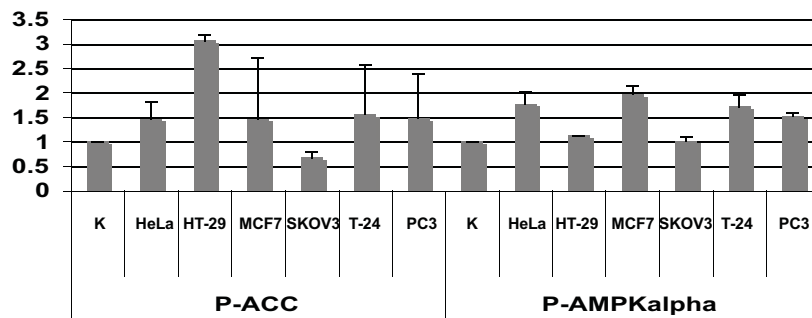

**A**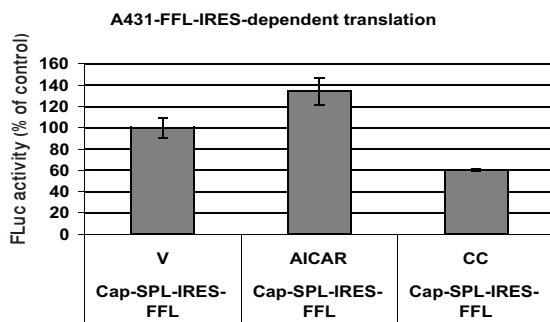**B**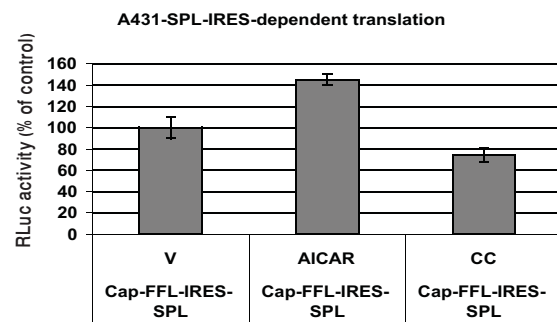**C**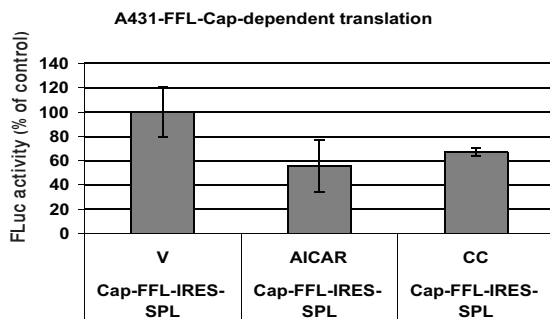**D**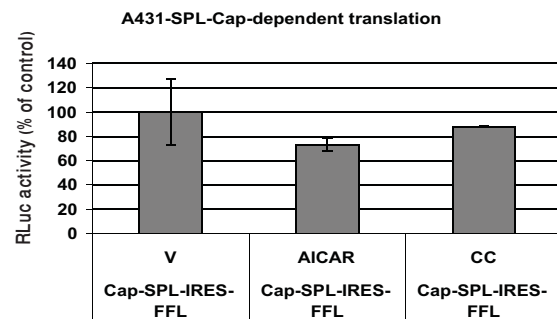**E**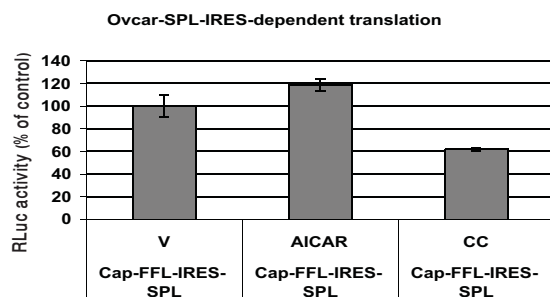**F**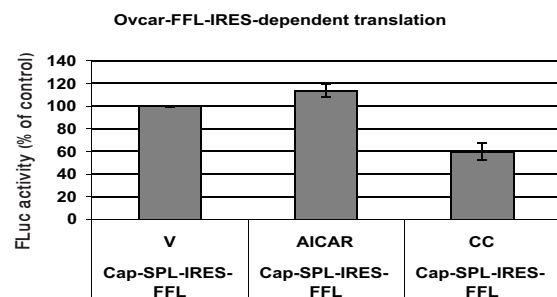**G**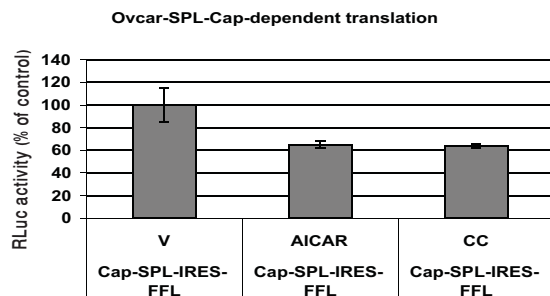**H**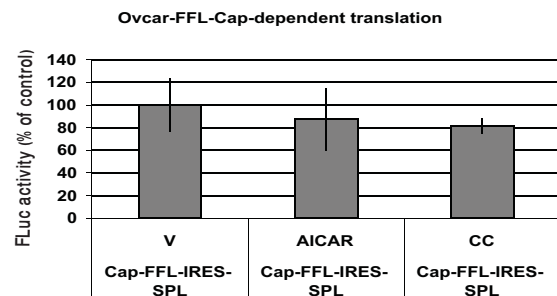**I**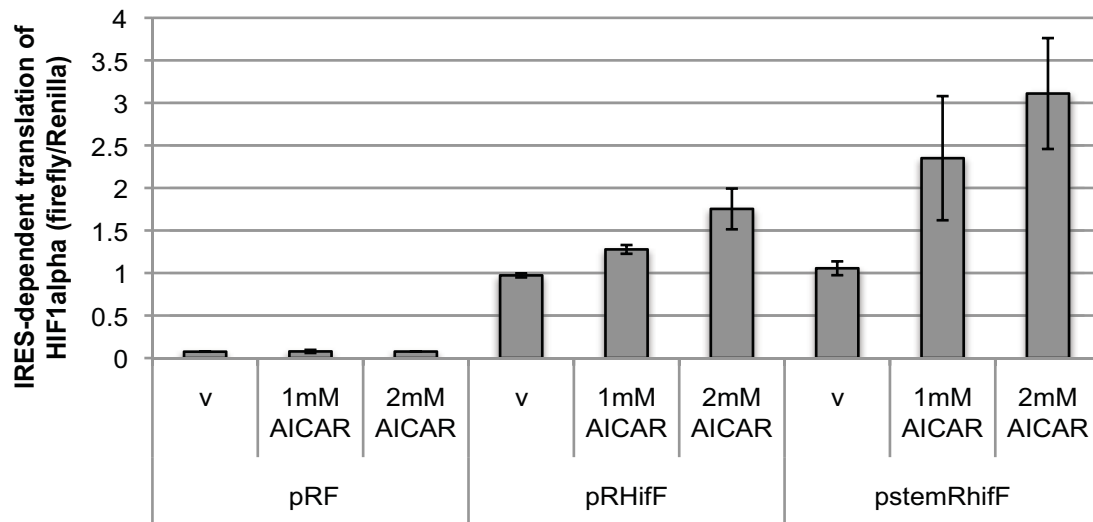

Fig. S11

**A**

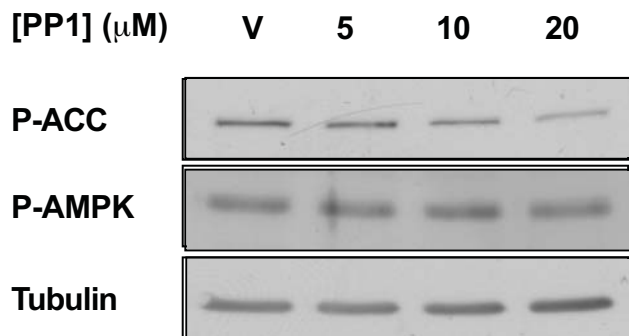

**B**

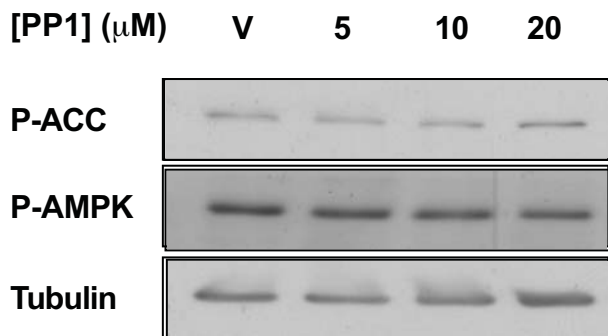

**C**

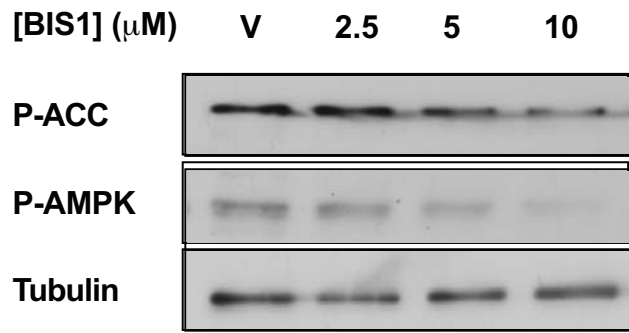

**D**

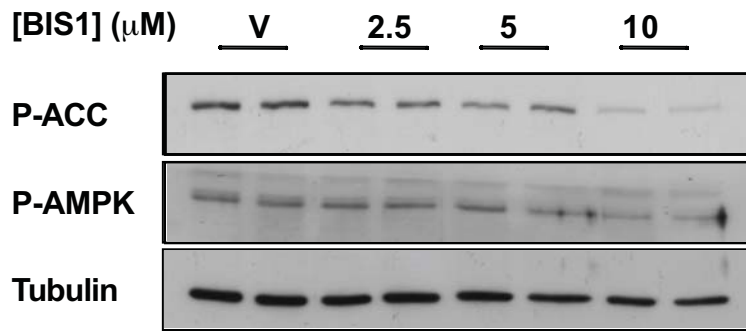

Fig. S12

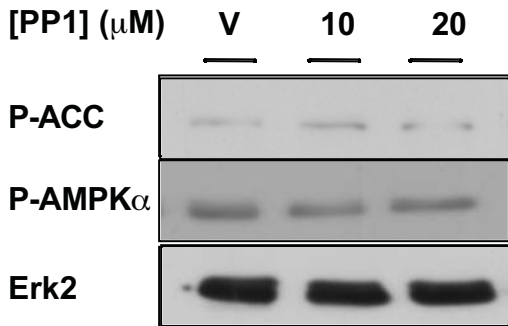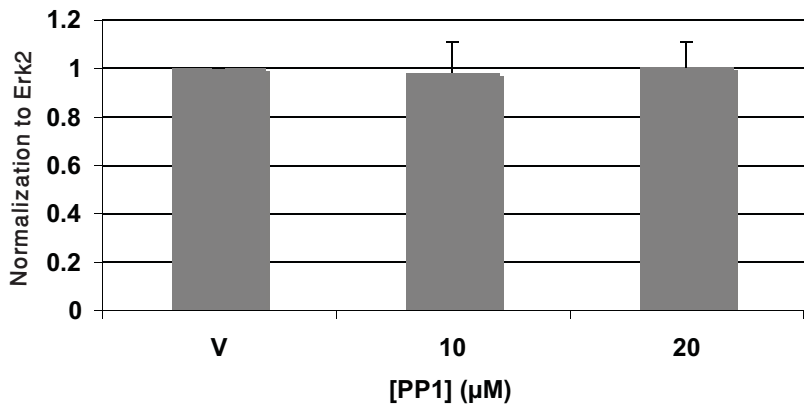

Fig. S2

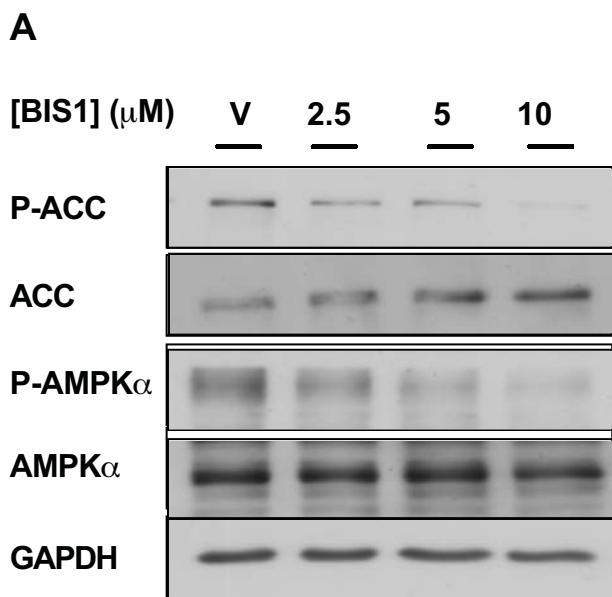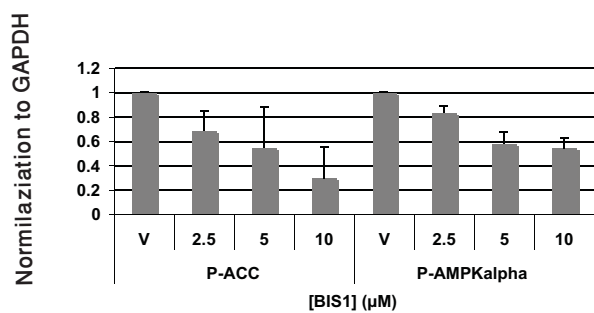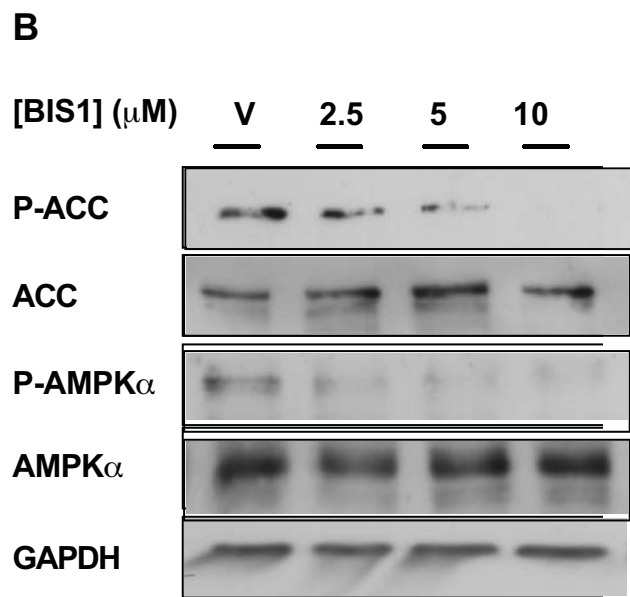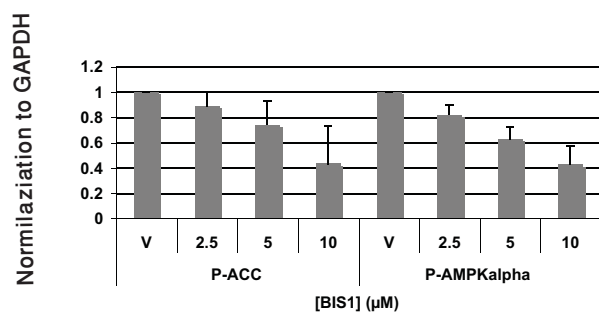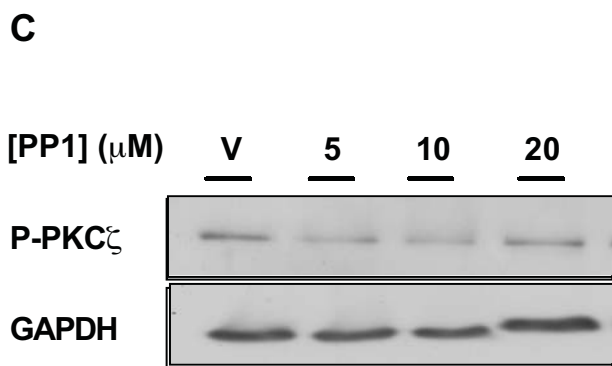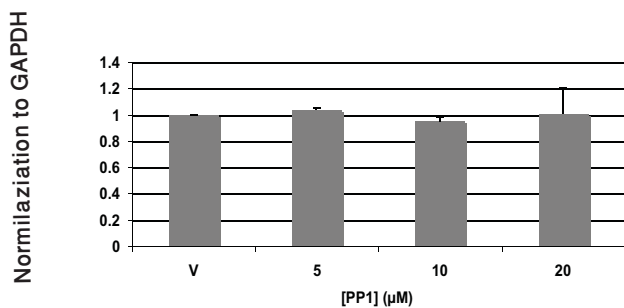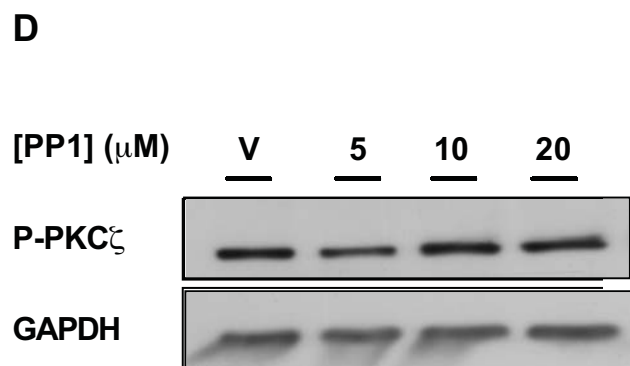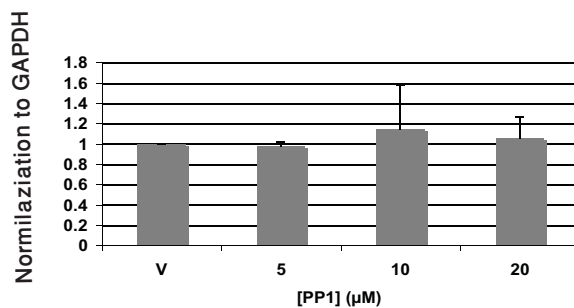

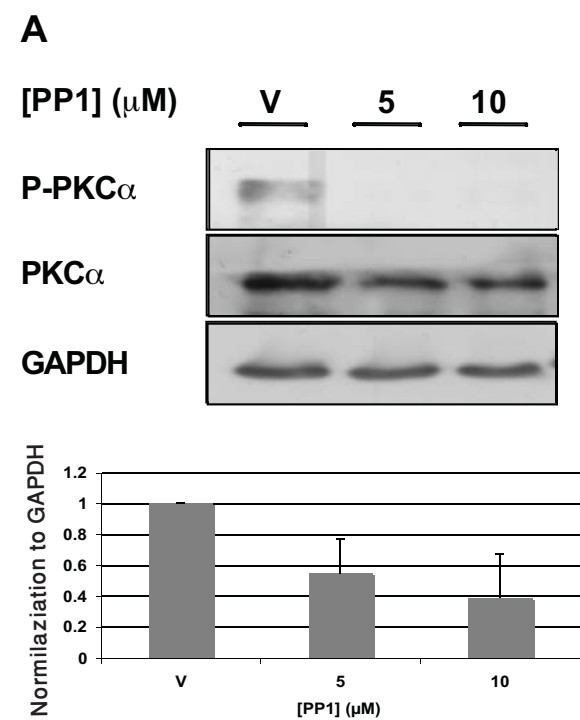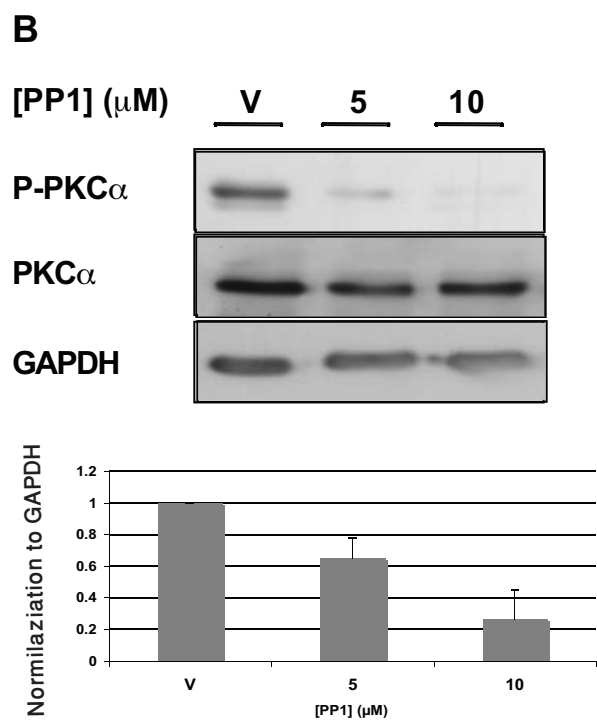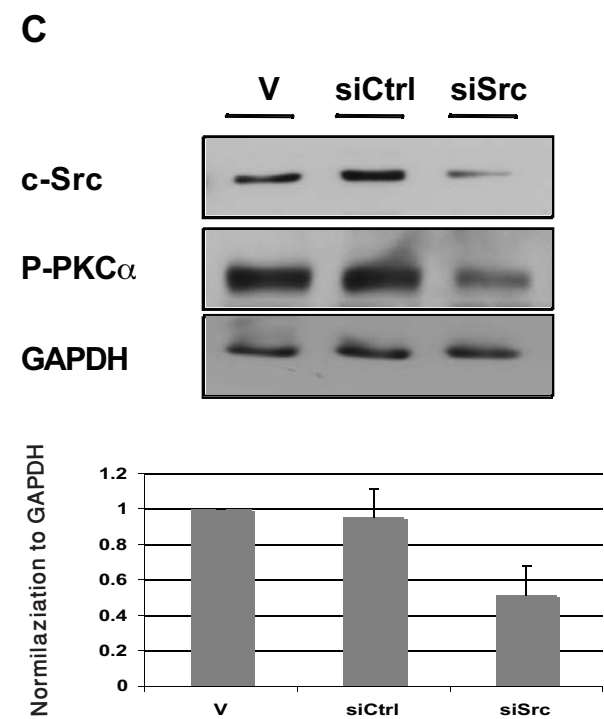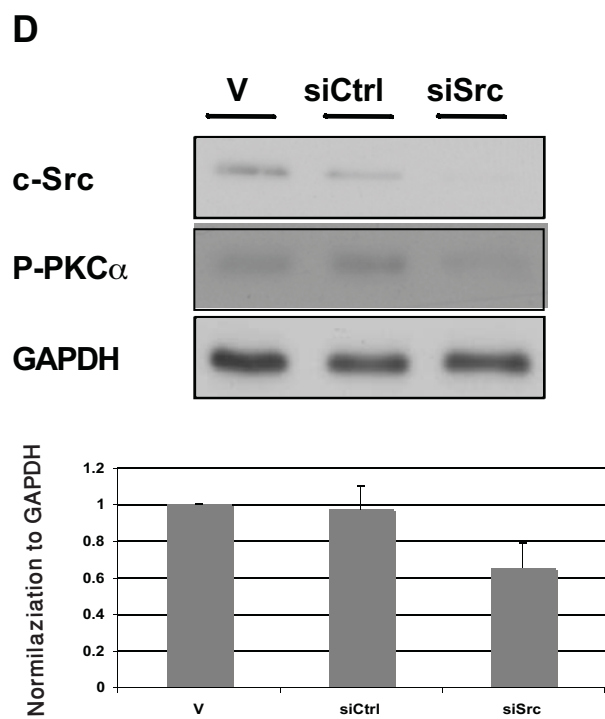



Fig. S4

**A**

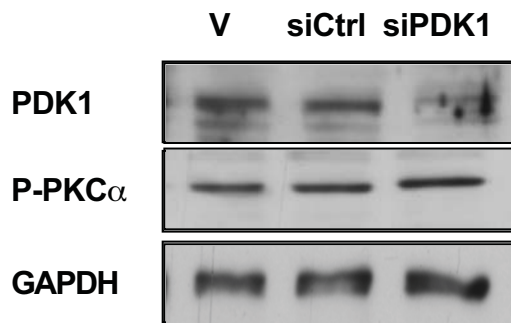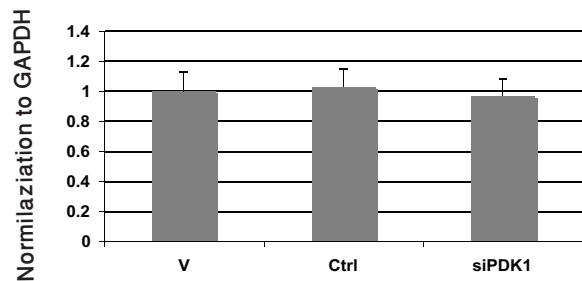

**B**

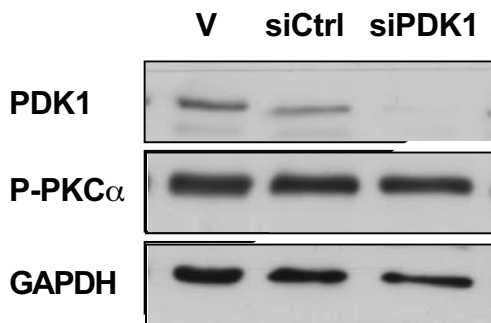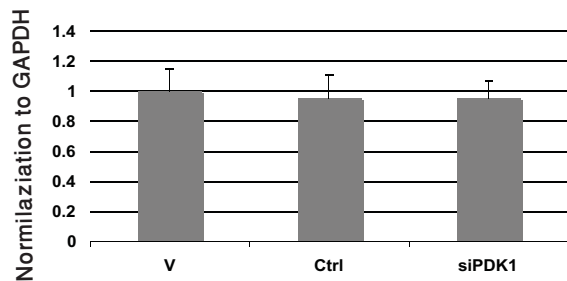

Fig. S5

**A**

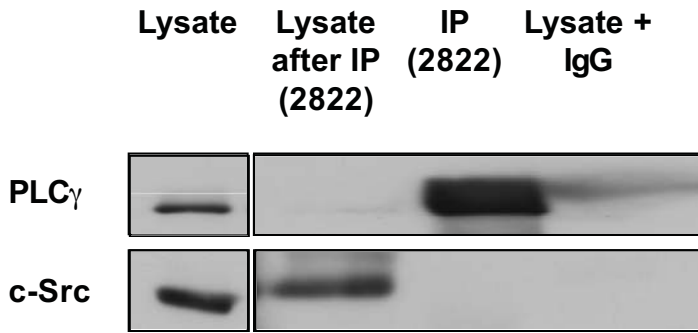

**B**

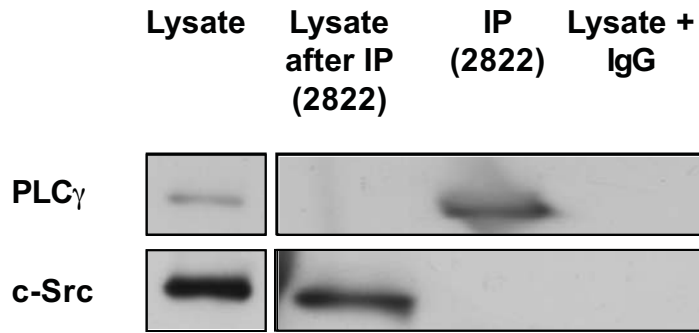

Fig. S6

**A**

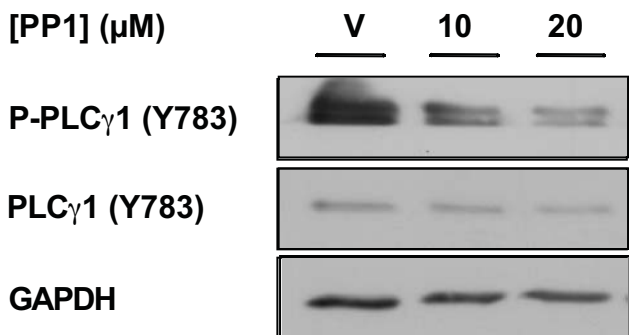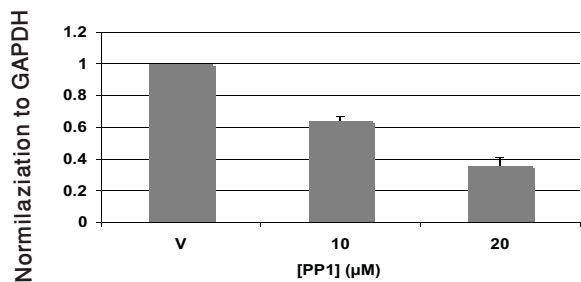

**B**

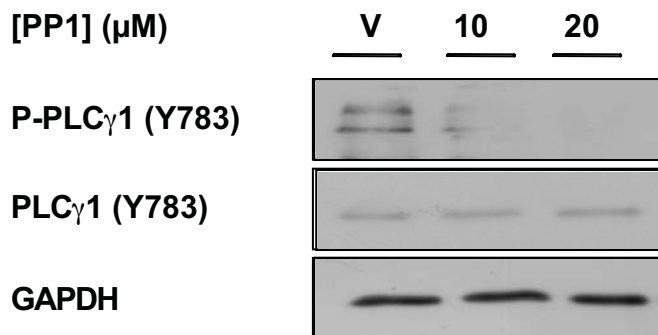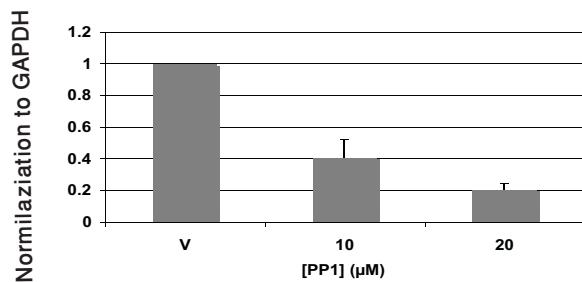

**C**

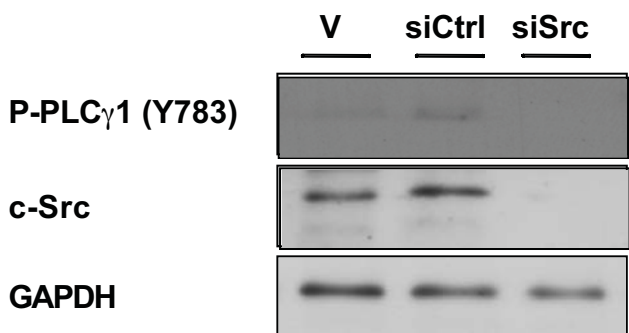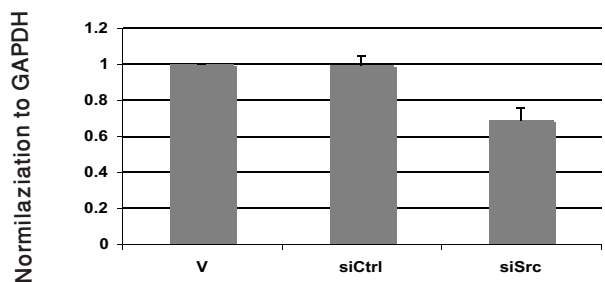

**D**

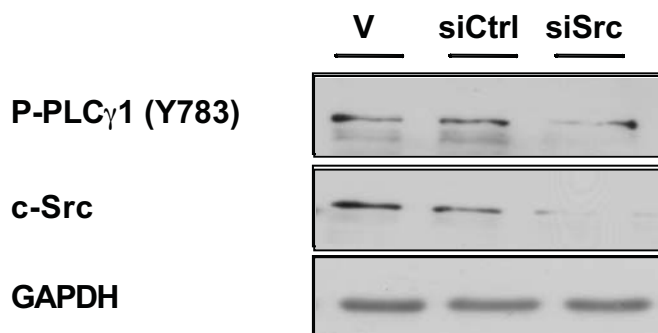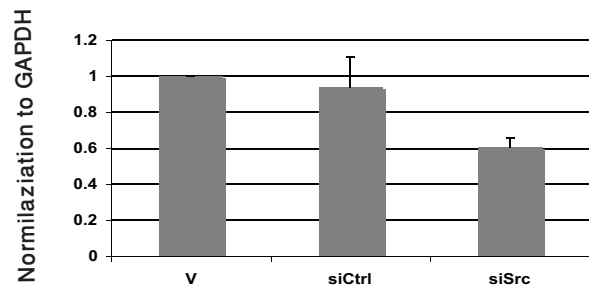

Fig. S7

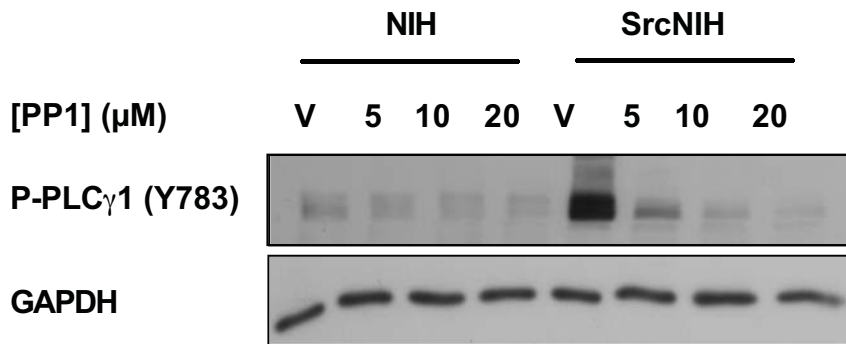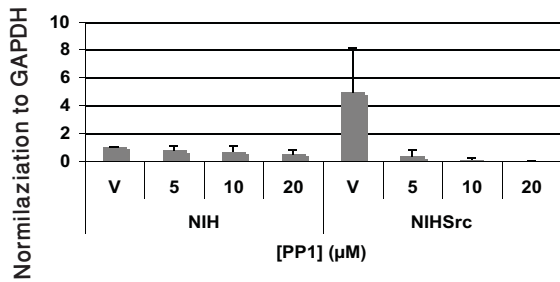

Fig. S8

**A**

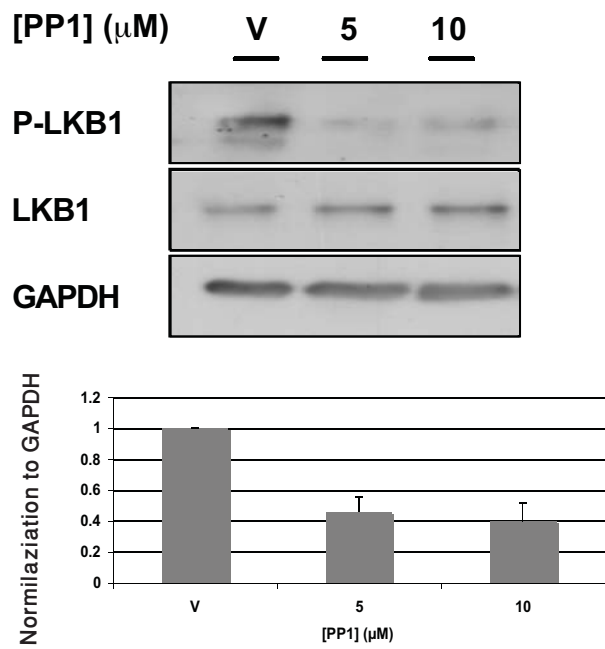

**B**

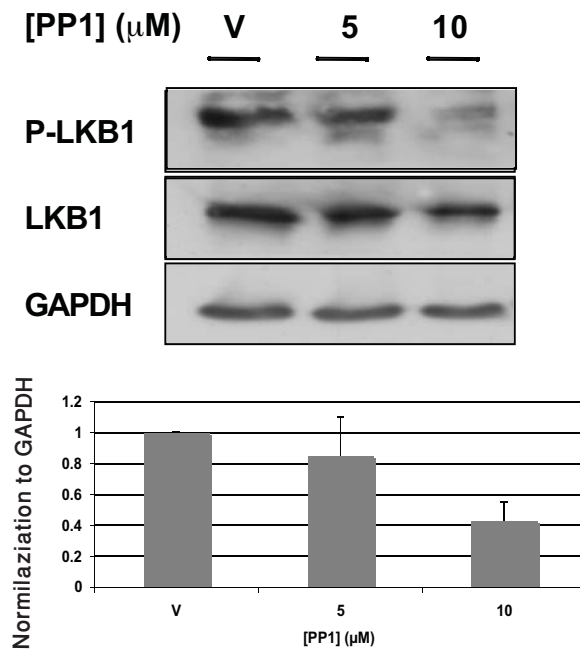

**C**

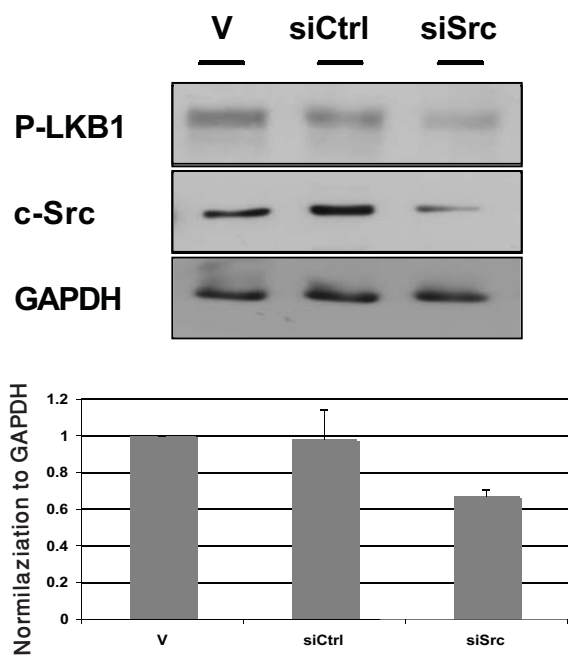

**D**

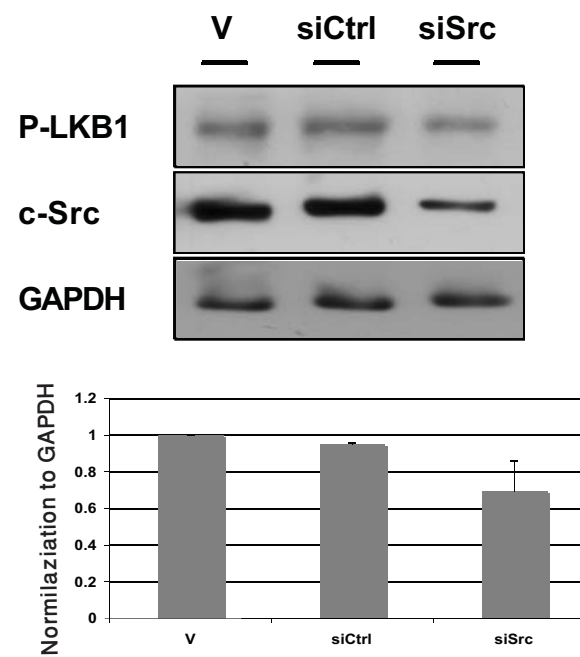

**E**

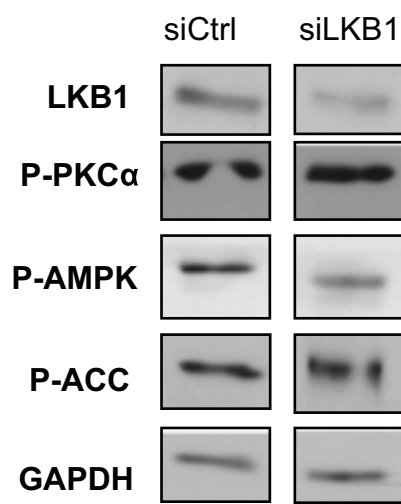

Fig. S9

| Lane no.          | 1  | 2 | 3  | 4  | 5  | 6  | 7  |
|-------------------|----|---|----|----|----|----|----|
| 20ng PKC $\alpha$ | -  | + | -  | +  | +  | +  | +  |
| ATP               | -  | - | +  | +  | +  | +  | +  |
| LKB1 (ng)         | 40 | - | 20 | 10 | 20 | 40 | 80 |

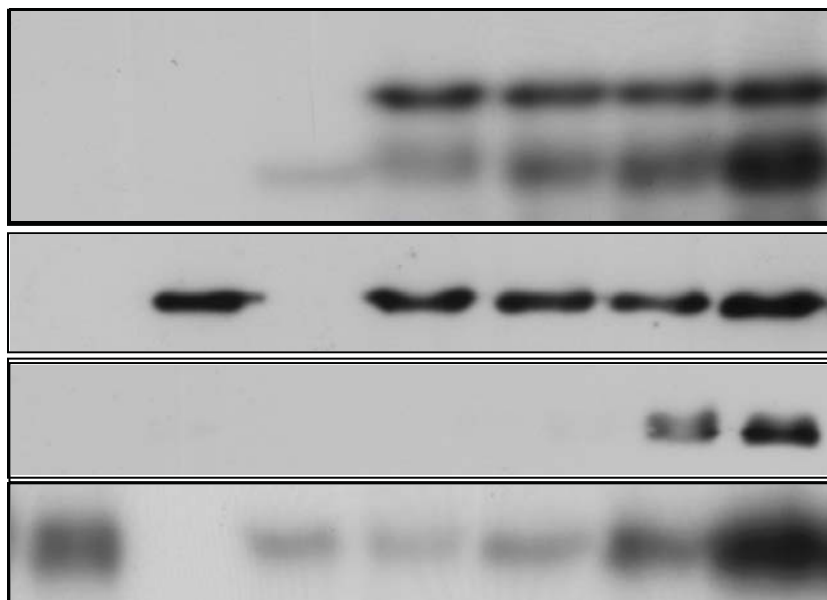

B

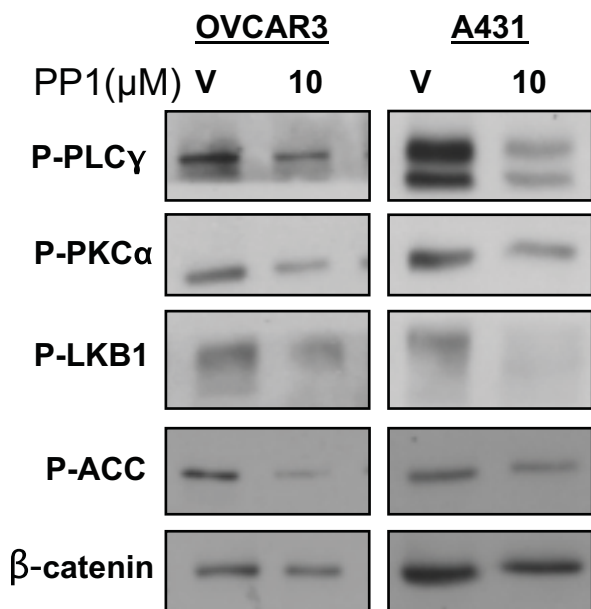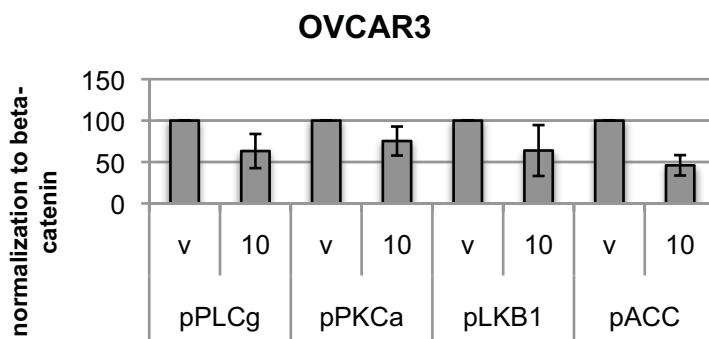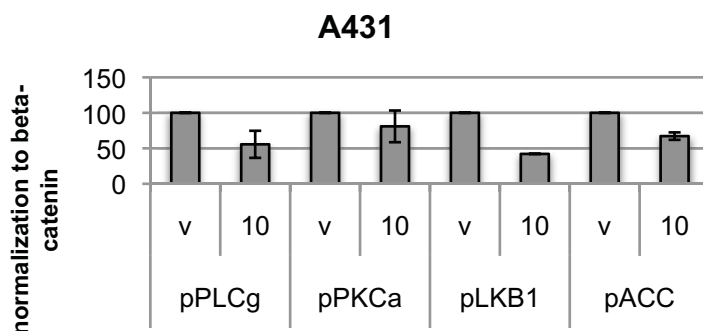

Supplement: supp_M110.211813_jbc.M110.211813-1.pdf [file supp_M110.211813_jbc.M110.211813-1.pdf]
